# Supplementary material
Source: PubMed Central journal article supplement (PMC3910917)
Supplement: CVI.00522-13_zcd999094889so1.pdf [file CVI.00522-13_zcd999094889so1.pdf]

Supplementary Figure 1 : Positive and Negative sample control IL-2 responses in SICCT-negative/ $\text{IFN}\gamma$ -positive naturally infected field reactor cattle

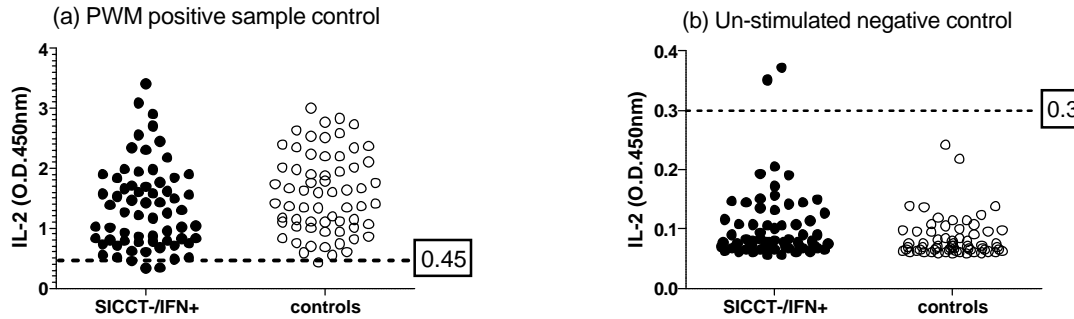

Supplementary Figure 1: Positive and negative sample control IL-2 responses in SICCT-negative/ $\text{IFN}\gamma$ -positive naturally infected field reactor cattle. Each spot represents a single animal. The O.D. cut-offs for PWM (0.45) and un-stimulated background (0.3) responses are shown.
